# Supplementary material for: Inhibition of hepatic oxalate overproduction ameliorates metabolic dysfunction-associated steatohepatitis
Source: Springer Nature journal article supplement (doi:10.1038/s42255-024-01134-4), 2024-09-27

Fig 1b: Protein abundance and quantification of LDHA relative to GAPDH in liver specimens from patients with MASH (n=23) or controls (n=10).

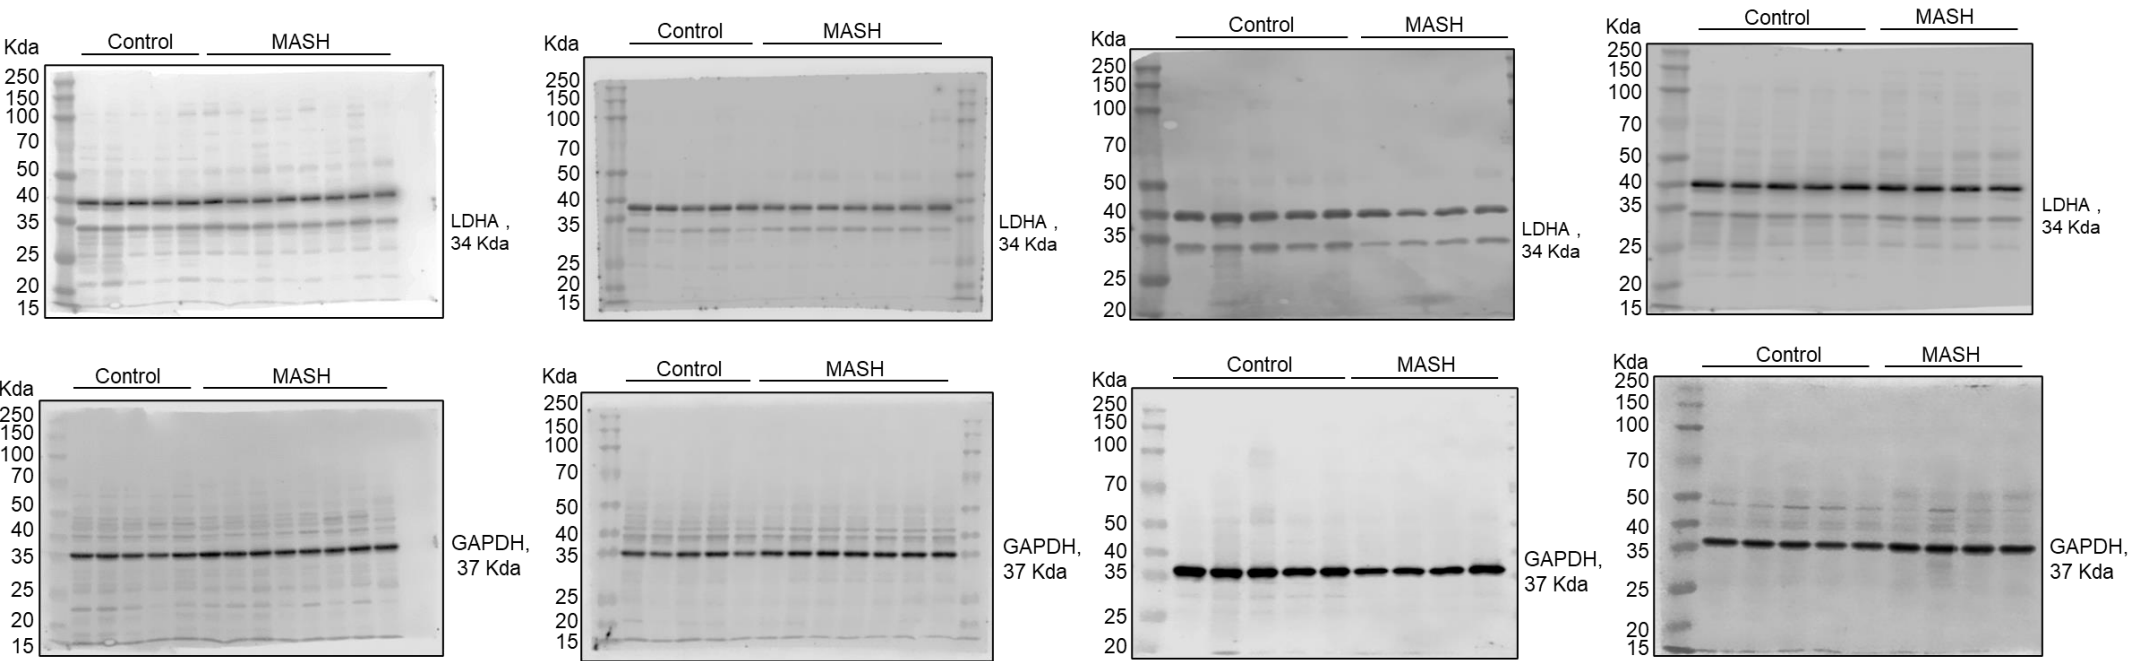

Supplement: MOESM15 [file 42255_2024_1134_MOESM15_ESM.pdf]
